# Supplementary material for: Seroprevalence of mucosal and cutaneous human papillomavirus (HPV) types among children and adolescents in the general population in Germany
Source: PubMed Central journal article supplement (PMC8751243; doi:10.1186/s12879-022-07028-8), 2022-01-10
Supplement: 12879_2022_7028_MOESM5_ESM.pdf [file 12879_2022_7028_MOESM5_ESM.pdf]

| Group      | Subjects, no. | Seroprevalence by HPV type, % (95%CI) |               |               |               |                  |               |               |               |               |
|------------|---------------|---------------------------------------|---------------|---------------|---------------|------------------|---------------|---------------|---------------|---------------|
|            |               | 6                                     | 11            | 16            | 18            | 31               | 33            | 45            | 52            | 58            |
| Overall    | 12257         | 24.8 (23.6-26.1)                      | 3.8 (3.3-4.4) | 2.6 (2.2-3.0) | 4.1 (3.5-4.7) | 6.4 (5.8-7.1)    | 0.6 (0.4-0.8) | 1.6 (1.4-1.9) | 1.2 (1.0-1.5) | 1.7 (1.4-2.1) |
|            |               | 2944                                  | 445           | 309           | 465           | 686              | 68            | 202           | 127           | 181           |
| Females    | 5973          | 23.1 (21.5-24.7)                      | 3.8 (3.2-4.5) | 2.5 (2.0-3.1) | 3.7 (3.0-4.4) | 6.4 (5.5-7.4)    | 0.7 (0.4-1.0) | 1.6 (1.2-2.0) | 1.2 (0.9-1.6) | 1.7 (1.3-2.3) |
| Age groups |               | 1302                                  | 205           | 150           | 222           | 337              | 34            | 105           | 61            | 90            |
| 1-3        | 615           | 18.4 (14.7-22.8)                      | 2.7 (1.6-4.6) | 1.5 (0.8-2.8) | 4.0 (2.4-6.4) | 14.4 (11.0-18.6) | 1.1 (0.4-3.0) | 0.9 (0.4-2.2) | 0.3 (0.1-1.1) | 0.9 (0.3-2.4) |
|            |               | 115                                   | 17            | 11            | 24            | 85               | 6             | 7             | 3             | 5             |
| 4-6        | 882           | 31.6 (27.5-36.0)                      | 6.4 (4.4-9.1) | 2.1 (1.2-3.6) | 2.6 (1.6-4.0) | 7.6 (5.8-9.8)    | 0.7 (0.3-1.9) | 1.2 (0.6-2.6) | 0.9 (0.4-2.2) | 1.7 (1.0-3.0) |
|            |               | 246                                   | 47            | 16            | 25            | 68               | 6             | 10            | 8             | 17            |
| 7-9        | 1071          | 28.1 (24.9-31.5)                      | 5.1 (3.7-6.9) | 2.2 (1.2-4.2) | 3.6 (2.5-5.1) | 5.7 (4.1-7.7)    | 0.2 (0.1-0.6) | 1.0 (0.5-2.0) | 0.9 (0.4-2.0) | 1.2 (0.6-2.3) |
|            |               | 296                                   | 50            | 16            | 37            | 60               | 6             | 13            | 10            | 11            |
| 10-11      | 823           | 26.2 (22.4-30.5)                      | 4.4 (2.9-6.8) | 2.7 (1.7-4.2) | 3.7 (2.3-5.9) | 5.0 (3.5-7.0)    | 0.3 (0.1-1.3) | 1.8 (0.9-3.6) | 1.5 (0.6-3.8) | 1.1 (0.5-2.3) |
|            |               | 201                                   | 34            | 22            | 27            | 39               | 2             | 12            | 5             | 7             |
| 12-13      | 889           | 20.3 (17.1-23.9)                      | 2.5 (1.5-4.2) | 2.1 (1.2-3.7) | 4.4 (3.1-6.4) | 3.4 (2.2-5.2)    | 0.8 (0.3-1.9) | 2.5 (1.4-4.2) | 1.2 (0.6-2.3) | 2.6 (1.4-4.9) |
|            |               | 167                                   | 23            | 20            | 35            | 30               | 5             | 20            | 9             | 17            |
| 14-15      | 858           | 17.4 (14.6-20.7)                      | 1.8 (1.0-3.2) | 3.7 (2.4-5.6) | 3.6 (2.5-5.1) | 3.0 (1.8-4.7)    | 0.0 (0.0-0.0) | 1.8 (1.1-2.8) | 0.6 (0.2-1.5) | 2.0 (0.9-4.3) |
|            |               | 142                                   | 16            | 31            | 35            | 23               | 0             | 20            | 5             | 14            |
| 16-17      | 834           | 17.1 (14.3-20.3)                      | 2.9 (1.7-4.7) | 3.9 (2.7-5.6) | 4.1 (2.9-5.9) | 4.0 (2.6-6.3)    | 1.4 (0.7-2.8) | 2.4 (1.5-3.7) | 3.2 (1.9-5.4) | 2.5 (1.4-4.3) |
|            |               | 134                                   | 18            | 34            | 39            | 31               | 9             | 23            | 20            | 18            |
| Males      | 6284          | 26.4 (24.9-28.0)                      | 3.8 (3.2-4.5) | 2.7 (2.2-3.2) | 4.5 (3.7-5.3) | 6.4 (5.5-7.5)    | 0.6 (0.4-0.8) | 1.7 (1.3-2.1) | 1.2 (0.8-1.7) | 1.7 (1.3-2.3) |
| Age groups |               | 1642                                  | 240           | 159           | 243           | 349              | 34            | 97            | 66            | 91            |
| 1-3        | 649           | 19.3 (15.7-23.5)                      | 4.2 (2.6-6.8) | 1.6 (0.7-3.3) | 4.7 (3.0-7.3) | 15.5 (12.3-19.3) | 0.9 (0.3-2.7) | 0.4 (0.1-1.1) | 1.0 (0.3-3.3) | 2.1 (0.9-4.6) |
|            |               | 141                                   | 28            | 10            | 27            | 99               | 6             | 4             | 3             | 7             |
| 4-6        | 933           | 35.8 (32.2-39.5)                      | 4.9 (3.5-6.8) | 2.6 (1.6-4.0) | 4.7 (3.0-7.2) | 8.1 (6.1-10.9)   | 0.2 (0.1-0.8) | 1.9 (1.0-3.5) | 1.5 (0.7-3.2) | 1.8 (0.9-3.4) |
|            |               | 338                                   | 49            | 27            | 34            | 66               | 2             | 11            | 11            | 12            |
| 7-9        | 1146          | 33.9 (30.4-37.5)                      | 4.9 (3.6-6.6) | 2.7 (1.6-4.5) | 4.4 (3.2-6.1) | 4.6 (3.4-6.3)    | 0.9 (0.4-1.9) | 2.1 (1.2-3.5) | 1.3 (0.7-2.7) | 1.4 (0.8-2.4) |
|            |               | 382                                   | 62            | 29            | 44            | 58               | 8             | 20            | 14            | 17            |
| 10-11      | 851           | 33.4 (29.4-37.7)                      | 4.4 (3.0-6.4) | 2.1 (1.1-4.0) | 2.6 (1.5-4.8) | 3.1 (1.9-4.9)    | 0.1 (0.0-0.6) | 1.2 (0.5-2.7) | 0.8 (0.4-2.0) | 1.3 (0.5-3.1) |
|            |               | 257                                   | 34            | 15            | 19            | 28               | 1             | 8             | 7             | 9             |
| 12-13      | 960           | 23.4 (20.3-26.8)                      | 3.1 (1.9-5.0) | 2.1 (1.3-3.4) | 3.6 (2.4-5.3) | 4.4 (3.1-6.1)    | 0.5 (0.2-1.3) | 1.7 (0.9-3.2) | 1.2 (0.7-2.2) | 1.4 (0.7-2.6) |
|            |               | 209                                   | 24            | 22            | 37            | 38               | 4             | 17            | 12            | 14            |
| 14-15      | 963           | 20.8 (17.9-24.1)                      | 3.1 (1.9-5.1) | 2.5 (1.6-3.9) | 4.7 (3.2-6.8) | 4.4 (2.8-6.6)    | 0.6 (0.3-1.3) | 1.6 (0.9-2.9) | 1.4 (0.7-2.9) | 2.1 (1.2-3.8) |
|            |               | 196                                   | 26            | 25            | 44            | 33               | 7             | 19            | 12            | 17            |
| 16-17      | 782           | 16.2 (13.1-19.9)                      | 1.9 (1.1-3.2) | 5.0 (3.4-7.3) | 6.0 (4.3-8.4) | 3.2 (2.1-5.0)    | 0.6 (0.3-1.4) | 2.8 (1.5-5.0) | 0.9 (0.4-2.3) | 2.0 (1.1-3.7) |
|            |               | 119                                   | 17            | 31            | 38            | 27               | 6             | 18            | 7             | 15            |

**Table S1. Seroprevalence of Individual Mucosal Human Papillomavirus Types by Gender and Age, HPV Seroprevalence Study (n = 12,257, sera collected 2003-2006).** NOTE. CI, confidence interval.
