# Supplementary material for: Seroprevalence of mucosal and cutaneous human papillomavirus (HPV) types among children and adolescents in the general population in Germany
Source: PubMed Central journal article supplement (PMC8751243; doi:10.1186/s12879-022-07028-8), 2022-01-10
Supplement: 12879_2022_7028_MOESM6_ESM.pdf [file 12879_2022_7028_MOESM6_ESM.pdf]

| Group      | Subjects, no. | Seroprevalence by HPV type, % (95%CI) |                  |                |               |               |                  |                  |
|------------|---------------|---------------------------------------|------------------|----------------|---------------|---------------|------------------|------------------|
|            |               | 1                                     | 4                | 8              | 10            | 38            | 41               | 49               |
| Overall    | 12257         | 31.7 (30.6-32.8)                      | 13.6 (12.8-14.4) | 4.5 (4.1-5.0)  | 5.0 (4.5-5.6) | 4.0 (3.6-4.4) | 7.5 (6.8-8.3)    | 8.1 (7.3-9.0)    |
|            |               | 4181                                  | 1757             | 563            | 591           | 504           | 943              | 1022             |
| Females    | 5973          | 33.8 (32.2-35.5)                      | 13.7 (12.7-14.8) | 4.3 (3.7-4.9)  | 5.3 (4.6-6.1) | 4.0 (3.5-4.6) | 8.0 (7.1-9.0)    | 7.9 (6.9-8.9)    |
| Age, years |               | 2162                                  | 871              | 284            | 291           | 246           | 487              | 499              |
| 1-3        | 615           | 2.1 (1.1-4.0)                         | 5.4 (3.5-8.4)    | 1.5 (0.6-3.7)  | 3.5 (1.9-6.2) | 2.0 (1.0-4.0) | 2.2 (1.2-3.9)    | 1.7 (0.9-2.9)    |
|            |               | 10                                    | 31               | 6              | 18            | 11            | 15               | 15               |
| 4-6        | 882           | 10.6 (8.1-13.7)                       | 6.6 (4.8-9.0)    | 1.6 (0.9-2.6)  | 4.1 (2.6-6.6) | 2.5 (1.6-3.8) | 4.0 (2.7-5.8)    | 3.6 (2.3-5.6)    |
|            |               | 81                                    | 61               | 19             | 31            | 23            | 37               | 30               |
| 7-9        | 1071          | 29.3 (25.6-33.2)                      | 11.5 (9.1-14.4)  | 2.4 (1.6-3.5)  | 5.9 (4.3-8.1) | 3.9 (2.8-5.4) | 5.4 (4.0-7.2)    | 6.0 (4.4-8.2)    |
|            |               | 315                                   | 114              | 32             | 53            | 41            | 59               | 64               |
| 10-11      | 823           | 50.5 (46.4-54.6)                      | 13.6 (10.7-17.1) | 3.0 (2.0-4.5)  | 4.6 (3.0-6.8) | 3.1 (1.9-5.1) | 9.4 (7.1-12.4)   | 7.7 (5.6-10.4)   |
|            |               | 396                                   | 117              | 31             | 35            | 22            | 63               | 64               |
| 12-13      | 889           | 51.2 (46.6-55.7)                      | 18.5 (15.7-21.7) | 4.7 (3.4-6.5)  | 6.0 (4.0-8.7) | 4.1 (2.9-5.8) | 10.3 (7.9-13.4)  | 11.8 (9.7-14.2)  |
|            |               | 450                                   | 162              | 46             | 51            | 38            | 89               | 108              |
| 14-15      | 858           | 51.9 (48.0-55.9)                      | 21.5 (18.5-24.7) | 8.0 (6.0-10.4) | 6.4 (4.6-8.8) | 6.2 (4.5-8.4) | 12.5 (10.2-15.3) | 11.7 (9.3-14.6)  |
|            |               | 445                                   | 188              | 66             | 49            | 50            | 98               | 94               |
| 16-17      | 834           | 55.7 (51.7-59.6)                      | 22.6 (19.8-25.8) | 9.9 (7.3-13.3) | 6.7 (4.8-9.1) | 6.9 (5.3-9.1) | 14.8 (12.1-18.1) | 15.2 (12.2-18.8) |
|            |               | 465                                   | 198              | 84             | 54            | 61            | 126              | 124              |
| Males      | 6284          | 29.7 (28.4-31.1)                      | 13.5 (12.4-14.6) | 4.7 (4.1-5.4)  | 4.8 (4.1-5.6) | 4.0 (3.5-4.5) | 7.1 (6.2-8.1)    | 8.4 (7.3-9.5)    |
| Age, years |               | 2019                                  | 886              | 279            | 300           | 258           | 456              | 523              |
| 1-3        | 649           | 0.9 (0.4-1.8)                         | 6.0 (3.9-9.3)    | 1.5 (0.7-3.1)  | 5.0 (3.0-8.1) | 1.9 (1.0-3.8) | 4.3 (2.7-6.9)    | 2.6 (1.4-4.7)    |
|            |               | 9                                     | 32               | 9              | 24            | 14            | 25               | 17               |
| 4-6        | 933           | 10.7 (8.4-13.6)                       | 4.9 (3.6-6.8)    | 3.8 (2.5-5.9)  | 2.7 (1.8-4.0) | 3.4 (2.2-5.2) | 2.8 (1.9-4.2)    | 6.8 (4.7-9.7)    |
|            |               | 81                                    | 52               | 28             | 32            | 27            | 32               | 48               |
| 7-9        | 1146          | 27.3 (24.4-30.3)                      | 7.2 (5.7-9.0)    | 3.0 (2.1-4.4)  | 3.1 (2.1-4.6) | 2.9 (2.0-4.0) | 5.3 (3.7-7.6)    | 6.3 (4.7-8.4)    |
|            |               | 301                                   | 98               | 35             | 39            | 42            | 57               | 72               |
| 10-11      | 851           | 40.0 (35.9-44.2)                      | 17.3 (14.2-20.9) | 5.1 (3.5-7.3)  | 6.4 (4.5-9.0) | 5.2 (3.7-7.2) | 7.5 (5.7-9.7)    | 9.7 (7.5-12.5)   |
|            |               | 346                                   | 128              | 39             | 44            | 41            | 71               | 86               |
| 12-13      | 960           | 46.8 (42.5-51.2)                      | 17.7 (14.7-21.2) | 5.5 (4.1-7.4)  | 5.7 (4.0-8.1) | 5.3 (3.7-7.7) | 8.6 (6.6-11.2)   | 9.9 (7.6-12.7)   |
|            |               | 451                                   | 160              | 50             | 52            | 43            | 79               | 95               |
| 14-15      | 963           | 46.6 (42.5-50.7)                      | 22.8 (19.8-26.1) | 5.6 (4.1-7.6)  | 6.7 (5.0-8.7) | 4.4 (3.1-6.1) | 10.4 (8.4-12.8)  | 11.8 (9.4-14.8)  |
|            |               | 456                                   | 212              | 50             | 67            | 43            | 99               | 106              |
| 16-17      | 782           | 47.7 (43.4-52.0)                      | 23.8 (20.7-27.1) | 9.5 (7.3-12.2) | 5.2 (3.7-7.3) | 5.6 (4.0-7.8) | 12.6 (9.9-15.9)  | 13.4 (10.8-16.5) |
|            |               | 375                                   | 204              | 68             | 42            | 48            | 93               | 99               |

**Table S2. Seroprevalence of Individual Cutaneous Human Papillomavirus Types by Gender and Age, HPV Seroprevalence Study (n = 12,257, sera collected 2003-2006).** NOTE. CI, confidence interval.
