# Supplementary material for: Seroprevalence of mucosal and cutaneous human papillomavirus (HPV) types among children and adolescents in the general population in Germany
Source: PubMed Central journal article supplement (PMC8751243; doi:10.1186/s12879-022-07028-8), 2022-01-10
Supplement: 12879_2022_7028_MOESM7_ESM.pdf [file 12879_2022_7028_MOESM7_ESM.pdf]

|                                            | Crude PR<br>(95%CI) | p-value | Fully adjusted<br>PR (95%CI) <sup>§</sup> | p-value |
|--------------------------------------------|---------------------|---------|-------------------------------------------|---------|
| <b>Gender</b>                              |                     |         |                                           |         |
| Female                                     | Ref                 |         | Ref                                       |         |
| Male                                       | 1.1 (1.1-1.2)       | 0.001   | 1.2 (1.1-1.3)                             | <0.001  |
| <b>Age group (years)</b>                   |                     |         |                                           |         |
| 1-3                                        | Ref                 |         | Ref                                       |         |
| 4-6                                        | 1.8 (1.5-2.1)       | <0.001  | 1.7 (1.4-2.0)                             | <0.001  |
| 7-9                                        | 1.6 (1.4-1.9)       | <0.001  | 1.5 (1.3-1.8)                             | <0.001  |
| 10-11                                      | 1.6 (1.3-1.9)       | <0.001  | 1.5 (1.2-1.7)                             | <0.001  |
| 12-13                                      | 1.2 (1.0-1.4)       | 0.133   | 1.1 (0.9-1.3)                             | 0.604   |
| 14-15                                      | 1.0 (0.8-1.2)       | 0.910   | 0.9 (0.8-1.1)                             | 0.514   |
| 16-17                                      | 0.9 (0.7-1.1)       | 0.199   | 0.8 (0.7-1.0)                             | 0.105   |
| <b>Region of Residence</b>                 |                     |         |                                           |         |
| West Germany                               | Ref                 |         | Ref                                       |         |
| East Germany                               | 0.8 (0.7-0.9)       | <0.001  | 0.8 (0.7-0.9)                             | 0.001   |
| <b>Urbanity</b>                            |                     |         |                                           |         |
| Rural                                      | Ref                 |         | Ref                                       |         |
| Small City                                 | 1.2 (1.0-1.4)       | 0.041   | 1.1 (1.0-1.3)                             | 0.107   |
| Medium Sized City                          | 1.1 (0.9-1.3)       | 0.211   | 1.1 (0.9-1.2)                             | 0.446   |
| Large City                                 | 1.2 (1.0-1.4)       | 0.037   | 1.2 (1.0-1.4)                             | 0.038   |
| <b>Socioeconomic status of parents</b> ns# |                     |         |                                           |         |
| Low                                        | Ref                 |         |                                           |         |
| Middle                                     | 1.0 (0.9-1.1)       | 0.448   |                                           |         |
| High                                       | 1.0 (0.9-1.1)       | 0.625   |                                           |         |
| <b>Migratory background of parents</b> ns# |                     |         |                                           |         |
| None                                       | Ref                 |         |                                           |         |
| One parent                                 | 1.1 (1.0-1.3)       | 0.085   |                                           |         |
| Both parents                               | 1.2 (1.0-1.3)       | 0.005   |                                           |         |
| <b>Number of household members</b> ns#     |                     |         |                                           |         |
|                                            | 1.1 (1.1-1.1)       | <0.001  |                                           |         |
| <b>Number of siblings in household</b>     |                     |         |                                           |         |
|                                            | 1.1 (1.1-1.1)       | <0.001  | 1.1 (1.1-1.1)                             | <0.001  |
| <b>BMI</b> ns#                             |                     |         |                                           |         |
|                                            | 1.0 (1.0-1.0)       | <0.001  |                                           |         |

**Table S3. Regression estimates for associated factors with seropositivity for HPV-6, HPV Seroprevalence Study (n = 12,257, sera collected 2003-2006).** NOTES. PR Prevalence Ratio, CI Confidence Interval, Ref Reference, § Mutually adjusted for all other variables in the model, #ns= Variables were not significantly associated with HPV seroprevalence in the final model and therefore excluded
