# Supplementary material for: Seroprevalence of mucosal and cutaneous human papillomavirus (HPV) types among children and adolescents in the general population in Germany
Source: PubMed Central journal article supplement (PMC8751243; doi:10.1186/s12879-022-07028-8), 2022-01-10
Supplement: 12879_2022_7028_MOESM8_ESM.pdf [file 12879_2022_7028_MOESM8_ESM.pdf]

|                                        | Crude PR<br>(95%CI) | p-value | Fully adjusted<br>PR (95%CI) <sup>§</sup> | p-value |
|----------------------------------------|---------------------|---------|-------------------------------------------|---------|
| <b>Gender</b>                          |                     |         |                                           |         |
| Female                                 | Ref                 |         |                                           |         |
| Male                                   | 1.0 (0.8-1.3)       | 0.879   | ns <sup>#</sup>                           |         |
| <b>Age group (years)</b>               |                     |         |                                           |         |
| 1-3                                    | Ref                 |         | Ref                                       |         |
| 4-6                                    | 1.6 (1.1-2.4)       | 0.021   | 1.6 (1.0-2.4)                             | 0.030   |
| 7-9                                    | 1.4 (1.0-2.1)       | 0.072   | 1.4 (0.9-2.0)                             | 0.111   |
| 10-11                                  | 1.3 (0.8-2.0)       | 0.318   | 1.2 (0.7-1.9)                             | 0.502   |
| 12-13                                  | 0.8 (0.5-1.3)       | 0.372   | 0.8 (0.5-1.2)                             | 0.262   |
| 14-15                                  | 0.7 (0.4-1.2)       | 0.201   | 0.7 (0.4-1.2)                             | 0.161   |
| 16-17                                  | 0.7 (0.4-1.1)       | 0.141   | 0.7 (0.4-1.2)                             | 0.189   |
| <b>Region of Residence</b>             |                     |         |                                           |         |
| West Germany                           | Ref                 |         | Ref                                       |         |
| East Germany                           | 0.6 (0.5-0.9)       | 0.007   | 0.7 (0.5-0.9)                             | 0.021   |
| <b>Urbanity</b>                        |                     |         |                                           |         |
| Rural                                  | Ref                 |         | ns <sup>#</sup>                           |         |
| Small City                             | 1.4 (0.9-2.1)       | 0.166   |                                           |         |
| Medium Sized City                      | 1.2 (0.7-1.8)       | 0.542   |                                           |         |
| Large City                             | 1.6 (1.0-2.5)       | 0.058   |                                           |         |
| <b>Socioeconomic status of parents</b> |                     |         |                                           |         |
| Low                                    | Ref                 |         | ns <sup>#</sup>                           |         |
| Middle                                 | 1.1 (0.9-1.5)       | 0.371   |                                           |         |
| High                                   | 1.2 (0.9-1.6)       | 0.270   |                                           |         |
| <b>Migratory background of parents</b> |                     |         |                                           |         |
| None                                   | Ref                 |         | ns <sup>#</sup>                           |         |
| One parent                             | 0.9 (0.6-1.5)       | 0.674   |                                           |         |
| Both parents                           | 1.1 (0.9-1.5)       | 0.405   |                                           |         |
| <b>Number of household members</b>     |                     |         |                                           |         |
|                                        | 1.1 (1.1-1.2)       | 0.002   | 1.1 (1.0-1.2)                             | 0.043   |
| <b>Number of siblings in household</b> |                     |         |                                           |         |
|                                        | 1.1 (1.0-1.2)       | 0.053   |                                           |         |
| <b>BMI</b>                             |                     |         |                                           |         |
|                                        | 1.0 (0.9-1.0)       | 0.004   | ns <sup>#</sup>                           |         |

**Table S4. Regression estimates for associated factors with seropositivity for HPV-11, HPV Seroprevalence Study (n = 12,257, sera collected 2003-2006).** NOTES. PR Prevalence Ratio, CI Confidence Interval, Ref Reference, § Mutually adjusted for all other variables in the model, #ns= Variables were not significantly associated with HPV seroprevalence in the final model and therefore excluded
