# Supplementary material for: Seroprevalence of mucosal and cutaneous human papillomavirus (HPV) types among children and adolescents in the general population in Germany
Source: PubMed Central journal article supplement (PMC8751243; doi:10.1186/s12879-022-07028-8), 2022-01-10
Supplement: 12879_2022_7028_MOESM9_ESM.pdf [file 12879_2022_7028_MOESM9_ESM.pdf]

|                                 | Crude PR<br>(95%CI) | p-value | Fully adjusted<br>PR (95%CI) <sup>§</sup> | p-value |
|---------------------------------|---------------------|---------|-------------------------------------------|---------|
| Gender                          |                     |         | ns <sup>#</sup>                           |         |
| Female                          |                     |         |                                           |         |
| Male                            | 1.2 (1.0-1.5)       | 0.095   |                                           |         |
| Age group (years)               |                     |         | ns <sup>#</sup>                           |         |
| 1-3                             | Ref                 |         |                                           |         |
| 4-6                             | 0.8 (0.5-1.3)       | 0.463   |                                           |         |
| 7-9                             | 0.9 (0.6-1.3)       | 0.650   |                                           |         |
| 10-11                           | 0.7 (0.5-1.2)       | 0.182   |                                           |         |
| 12-13                           | 0.9 (0.6-1.4)       | 0.707   |                                           |         |
| 14-15                           | 1.0 (0.7-1.4)       | 0.800   |                                           |         |
| 16-17                           | 1.2 (0.8-1.7)       | 0.421   |                                           |         |
| Region of Residence             |                     |         |                                           |         |
| West Germany                    | Ref                 |         | Ref                                       |         |
| East Germany                    | 0.7 (0.5-1.0)       | 0.055   | 0.7 (0.5-1.0)                             | 0.033   |
| Urbanity                        |                     |         |                                           |         |
| Rural                           | Ref                 |         | Ref                                       |         |
| Small City                      | 0.9 (0.6-1.2)       | 0.466   | 0.8 (0.6-1.2)                             | 0.320   |
| Medium Sized City               | 0.7 (0.5-1.0)       | 0.069   | 0.7 (0.4-1.0)                             | 0.041   |
| Large City                      | 0.9 (0.6-1.3)       | 0.421   | 0.8 (0.6-1.2)                             | 0.381   |
| Socioeconomic status of parents |                     |         | ns <sup>#</sup>                           |         |
| Low                             | Ref                 |         |                                           |         |
| Middle                          | 1.1 (0.9-1.5)       | 0.359   |                                           |         |
| High                            | 0.9 (0.7-1.2)       | 0.407   |                                           |         |
| Migratory background of parents |                     |         | ns <sup>#</sup>                           |         |
| None                            | Ref                 |         |                                           |         |
| One parent                      | 1.2 (0.8-1.8)       | 0.451   |                                           |         |
| Both parents                    | 0.9 (0.6-1.3)       | 0.523   |                                           |         |
| Number of household members     |                     |         | ns <sup>#</sup>                           |         |
|                                 | 1.0 (0.9-1.1)       | 0.985   |                                           |         |
| Number of siblings in household |                     |         | ns <sup>#</sup>                           |         |
|                                 | 1.0 (0.9-1.2)       | 0.707   |                                           |         |
| BMI                             |                     |         | ns <sup>#</sup>                           |         |
|                                 | 1.0 (1.0-1.0)       | 0.399   |                                           |         |

**Table S5. Regression estimates for associated factors with seropositivity for HPV-18, HPV Seroprevalence Study (n = 12,257, sera collected 2003-2006).** NOTES. PR Prevalence Ratio, CI Confidence Interval, Ref Reference, § Mutually adjusted for all other variables in the model, #ns= Variables were not significantly associated with HPV seroprevalence in the final model and therefore excluded
